# Supplementary material for: The Molecular Basis of Heat-Stable Enterotoxin for Vaccine Development and Cancer Cell Detection
Source: MDPI journal article supplement (doi:10.3390/molecules28031128), 2023-01-23
Supplement: s1 [file s1]

## Supplementary Materials

**Table S1.** Data collection and refinement statistics.

| <i>No. of restraints</i>                                    | <b>[D-Cys<sup>5</sup>,Asp<sup>7</sup>,Val<sup>8</sup>,D-Lys<sup>16</sup>]-<br/>ST<sub>p</sub>(5-17)<br/>topological isomer</b> |
|-------------------------------------------------------------|--------------------------------------------------------------------------------------------------------------------------------|
| All                                                         | 179                                                                                                                            |
| NOE distance restraints                                     | 176                                                                                                                            |
| Intra-residual                                              | 95                                                                                                                             |
| Sequential                                                  | 43                                                                                                                             |
| Medium range                                                | 20                                                                                                                             |
| Long range                                                  | 18                                                                                                                             |
| Disulfide bond                                              | 3                                                                                                                              |
| <i>Deviations from idealized covalent geometry</i>          |                                                                                                                                |
| Bonds (Å)                                                   | 0.0628 ± 4.2e-5                                                                                                                |
| Angles (°)                                                  | 0.516 ± 1.9e-3                                                                                                                 |
| Impropers (°)                                               | 0.291 ± 4.5e-3                                                                                                                 |
| <i>Mean coordinate RMSD from mean structure<sup>a</sup></i> |                                                                                                                                |
| Backbone heavy atoms                                        | 0.12 ± 0.05 Å                                                                                                                  |
| All heavy atoms                                             | 0.44 ± 0.14 Å                                                                                                                  |

<sup>a</sup> Root mean square deviation (RMSD) was calculated using 10 possible structures.

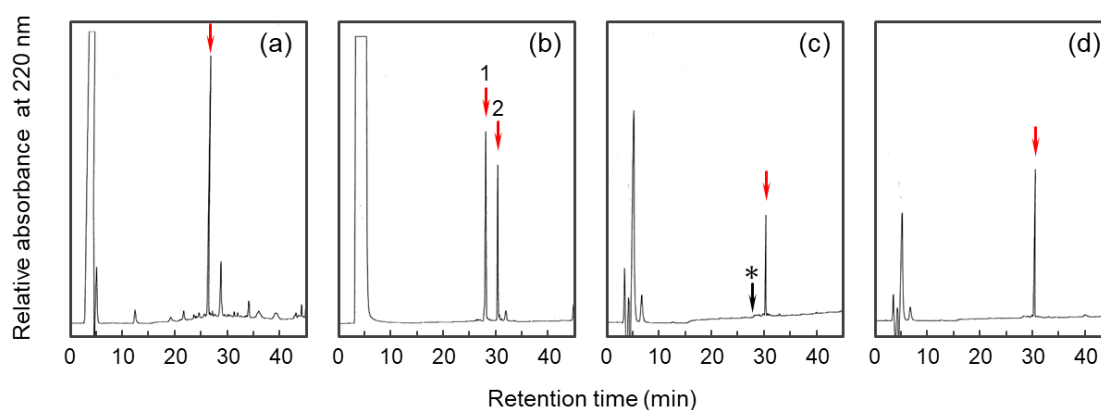

**Figure S1.** HPLC profiles of the preparation of the topological isomer and the native form of the [Mpr<sup>5</sup>,D-Lys<sup>16</sup>]-ST<sub>p</sub>(5-17) peptides. The air (a) and iodine (b) oxidations of the [Mpr<sup>5</sup>,Cys<sup>6</sup>(Acm),Cys<sup>14</sup>(Acm),D-Lys<sup>16</sup>]-ST<sub>p</sub>(5-17) with two disulfide bonds and the [Mpr<sup>5</sup>,D-Lys<sup>16</sup>]-ST<sub>p</sub>(5-17) peptide with three disulfide bonds, respectively. The thiol catalytic reaction (c and d) of the peaks 1 and 2 in (b), respectively. The arrow with an asterisk in (c) indicates the position of the peak 1 in (b). The target peptides were indicated by red arrows.

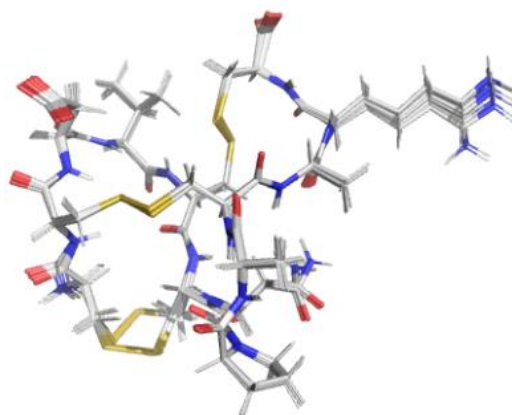

**Figure S2.** Superposition of the calculated NMR structures of the topological isomer of the [D-Cys<sup>5</sup>,Asp<sup>7</sup>,Val<sup>8</sup>,D-Lys<sup>16</sup>]-ST<sub>p</sub>(5-17) molecule.

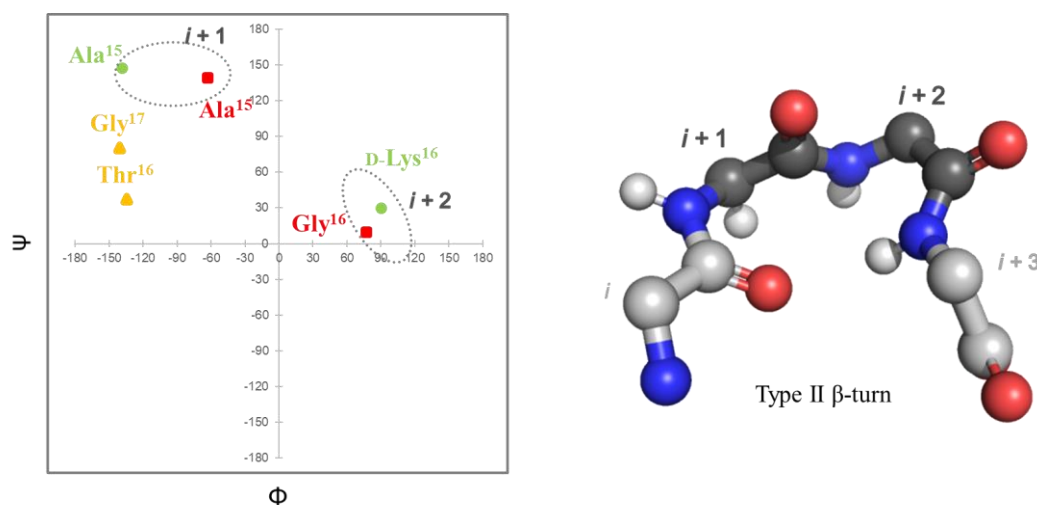

**Figure S3.** Ramachandran plots of the  $\varphi$  and  $\psi$  values of the amino acid residues which participate in the C-terminal region of the ST<sub>p</sub> molecules. Red, orange, and light green colors indicate the values for the native form (PDB ID: 1ETN) and the topological isomer (PDB ID: 7CSS) of wild type ST<sub>a</sub> molecules and the topological isomer (PDB ID: 8HR3) of the [D-Cys<sup>5</sup>,Asp<sup>7</sup>,Val<sup>8</sup>,D-Lys<sup>16</sup>]-ST<sub>p</sub>(5-17) molecule, respectively.

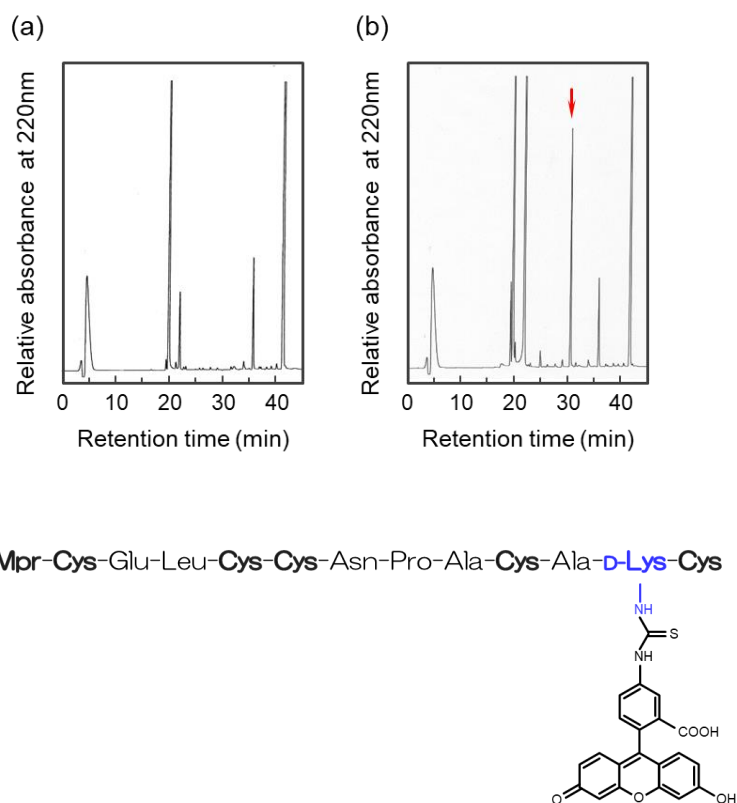

**Figure S4.** HPLC profiles of the FITC (a) and reaction mixtures (b) with the [Mpr<sup>5</sup>,D-Lys<sup>16</sup>]-ST<sub>p</sub>(5-17) peptide. The arrowed peak in (b) corresponds to [Mpr<sup>5</sup>,D-Lys<sup>16</sup>(FITC)]-ST<sub>p</sub>(5-17).
